# Supplementary material
Source: PubMed Central journal article supplement (PMC8169618)
Supplement: NIHMS1692685-supplement-1.pdf [file NIHMS1692685-supplement-1.pdf]

## Supplementary Index

### **Use of Donor-Derived-Cell-Free DNA as a Marker of Early Allograft Injury in Primary Graft Dysfunction (PGD) to Predict the Risk of Chronic Lung Allograft Dysfunction (CLAD)**

Michael Keller, Errol Bush, Joshua M. Diamond, Pali Shah, Joby Matthews, Anne W Brown, Junfeng Sun, Irina Timofte, Hyesik Kong, Ilker Tunc, Helen Luikart, Aldo Iacono, Steven D. Nathan, Kiran K. Khush, Jonathan Orens, Moon Jang, Sean Agbor-Enoh

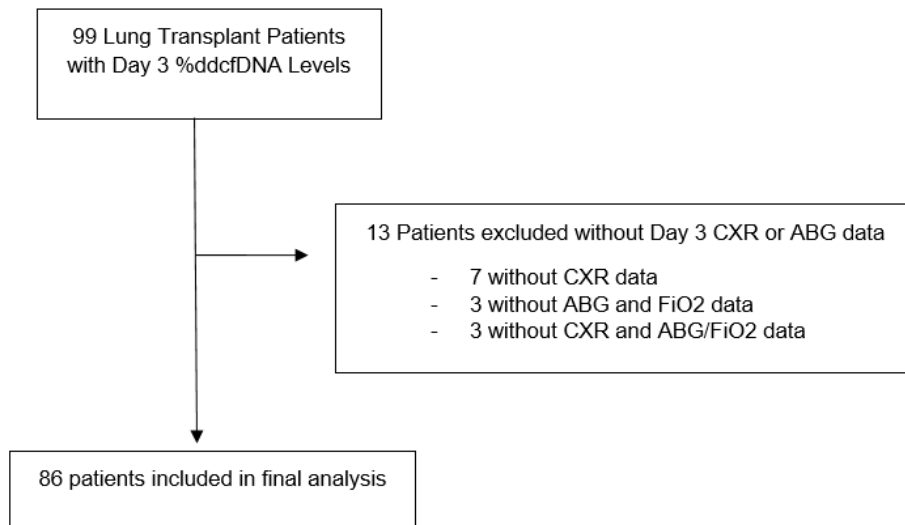

**Supplementary Figure 1:** Study Design. 99 patients had Day 3 %ddcfDNA results. 13 patients did not have available Day 3 CXR or ABG data and were excluded from the final analysis. 86 patients were included in the final analysis.

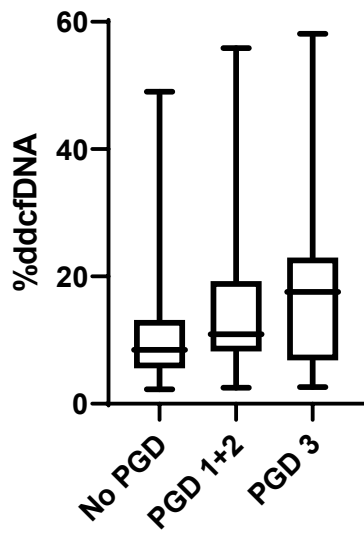

**Supplementary Figure 2:** Differences in Day 3 %ddcfDNA between severity grades of PGD. Results demonstrate median, interquartile range, maximum and minimum values. Non PGD vs PGD 1+2 vs PGD 3 (8.5% (5.6, 13.2) vs 10.9% (8.20, 19.3) vs 17.6% (8.1, 22.8),  $p = 0.03$ )

| <b>Supplementary Table 1: Characteristics of Patients with CLAD vs without CLAD</b> |                           |                        |                |
|-------------------------------------------------------------------------------------|---------------------------|------------------------|----------------|
|                                                                                     | <b>No CLAD<br/>(N=56)</b> | <b>CLAD<br/>(N=22)</b> | <b>P Value</b> |
| <b>Sex at Birth:</b>                                                                |                           |                        |                |
| Male                                                                                | 23 (50%)                  | 8 (36%)                | 0.43           |
| Female                                                                              | 23 (50%)                  | 14 (66%)               |                |
| <b>Race:</b>                                                                        |                           |                        |                |
| White                                                                               | 52 (93%)                  | 15 (68%)               | <b>0.08</b>    |
| Non-White                                                                           | 4 (7%)                    | 7 (32%)                |                |
| <b>Type of Transplant:</b>                                                          |                           |                        |                |
| Single                                                                              | 18 (32%)                  | 5 (23%)                | 0.45           |
| Double                                                                              | 38 (68%)                  | 17 (77%)               |                |
| <b>Donor-Recipient<br/>Race Mismatch:</b>                                           |                           |                        |                |
| Yes                                                                                 | 15 (27%)                  | 5 (33%)                | 0.85           |
| No                                                                                  | 41 (73%)                  | 15 (66%)               |                |
| <b>PGD</b>                                                                          |                           |                        |                |
| Yes                                                                                 | 30 (49%)                  | 11 (50%)               | 0.78           |
| No                                                                                  | 26 (51%)                  | 11 (50%)               |                |
| <b>PGD 3</b>                                                                        |                           |                        |                |
| Yes                                                                                 | 9 (16%)                   | 3 (14%)                | 0.79           |
| No                                                                                  | 47 (84%)                  | 19 (86%)               |                |

**Supplementary Table 1:** Characteristics of patients with CLAD and without CLAD with corresponding univariate analysis. Only Race was incorporated into the multivariate analysis.

**Race and PGD**

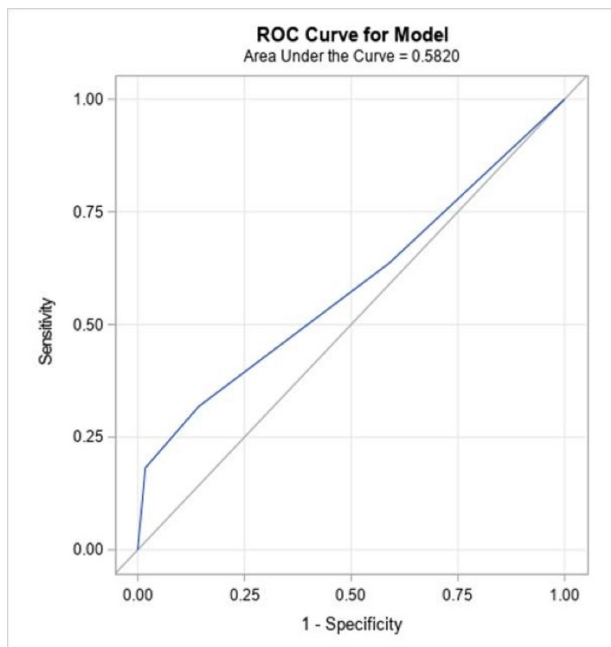

**Supplementary Figure 3a**

**Race+ PGD+ log2(%ddcfDNA) + PGD\*log2(%ddcfDNA)**

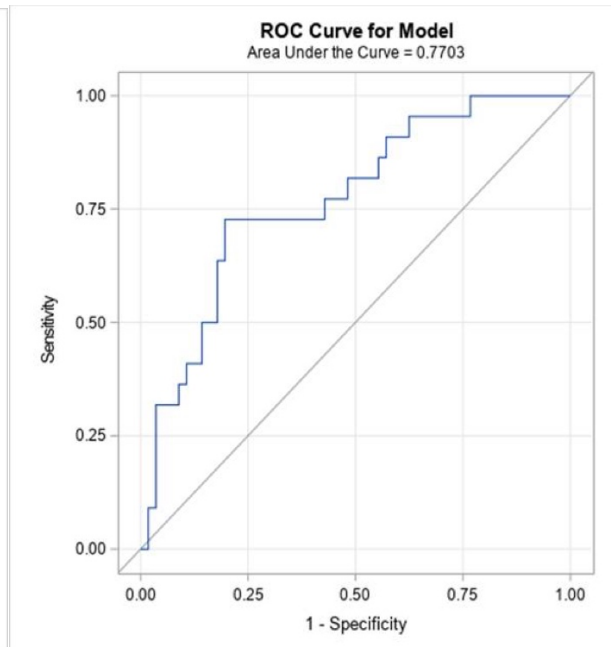

**Supplementary Figure 3b**

**Race+ PGD+ ACR + Infection + log2(%ddcfDNA) + PGD\*log2(%ddcfDNA)**

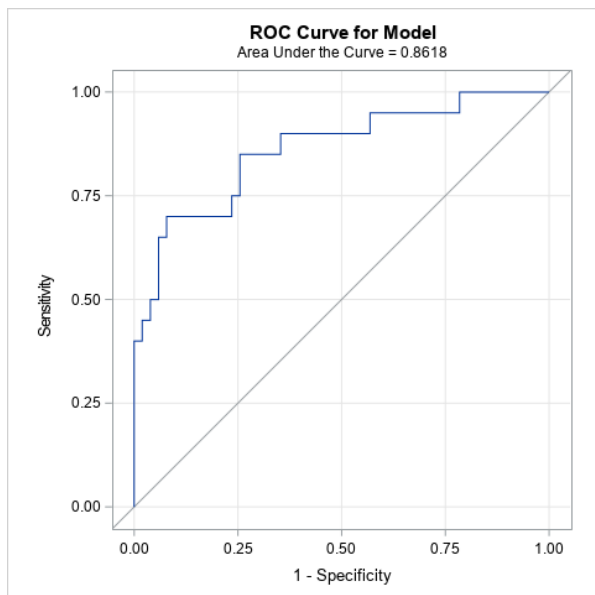

**Supplementary Figure 3c**

**Supplementary Figure 3. (a).** ROC curve of multivariable model incorporating Race and PGD as predictors of CLAD. **(b).** ROC curve of multivariable model incorporating Race and PGD in addition to %ddcfDNA. **(c).** ROC curve of multivariate model incorporating Race, PGD, %ddcfDNA, Infection and Rejection.
